# Supplementary material
Source: Springer Nature journal article supplement (https://www.springermedizin.de/resource/supplementary/12958_2010_867_MOESM1_ESM.PDF/9569054)
Supplement: MOESM1 [file 9569054]

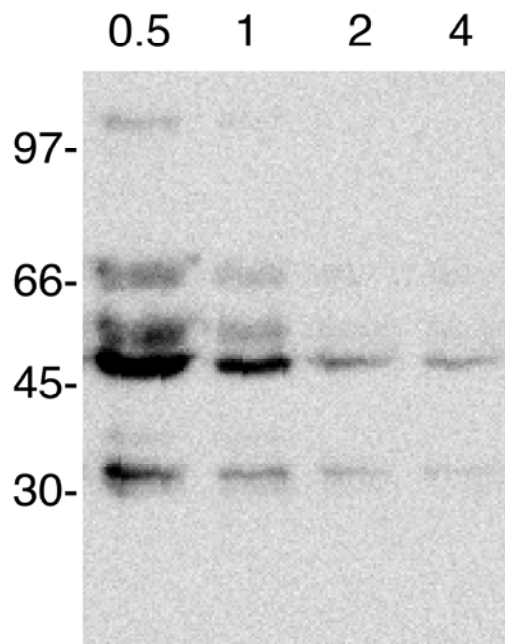

Figure 1 supplemental data. **Competition between the ADAM1 C-terminal peptide used for immunization and the ADAM1-CT antibody.**

ADAM-CT polyclonal antibody (1/10 000) was incubated overnight with increasing amount of the immunizing peptide (indicated on top in  $\mu\text{g}$ ). When tested on a western blot from a 0.25% TX100 testis extract, a clear decrease in intensity of the reactive bands is observed indicating the specificity of the antibody. (0.5  $\mu\text{g}$  of peptide has no effect on the signal as compared to the control). Although the testis sample was degraded by a long term freezing, it shows that all main reactive bands also retrieved on sperm membrane (see manuscript) are competed by the peptide. (Western blot from a 12% SDS-PAGE)
